# Supplementary material for: Single-cell transcriptomics reveal cellular diversity of aortic valve and the immunomodulation by PPARγ during hyperlipidemia
Source: PubMed Central journal article supplement (PMC9482653; doi:10.1038/s41467-022-33202-2), 2022-09-17
Supplement: 41467_2022_33202_MOESM1_ESM.pdf [file 41467_2022_33202_MOESM1_ESM.pdf]

## **Supplementary Information**

### **Single-cell transcriptomics reveal cellular diversity of aortic valve and the immunomodulation by PPAR $\gamma$ during hyperlipidemia**

Seung Hyun Lee et al.

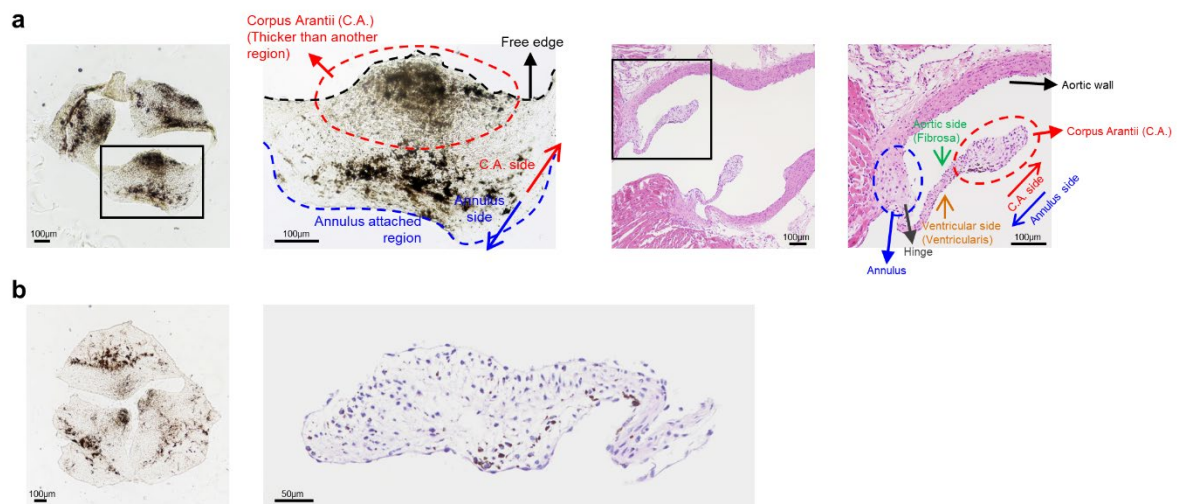

**Supplementary Fig. 1. Histological description of mouse aortic valve.**

**a.** Gross and histological features of mouse aortic valve. Whole-mount brightfield images (left), and H&E images (right). Black or dark brown colors are melanin pigments. Scale bar: 100µm. Data are representative of three independent experiments. **b.** Gross and histology of the aortic valve prepared for scRNA-seq and flow cytometric analysis. Aortic valves were carefully isolated from aortic sinus without contamination of other tissues. Whole-mount brightfield (left) and H&E images (right) of the isolated aortic valve. Black or dark brown spots are melanin pigments. Scale bar: 100 µm (left), 50 µm (right). Data are representative of three independent experiments.

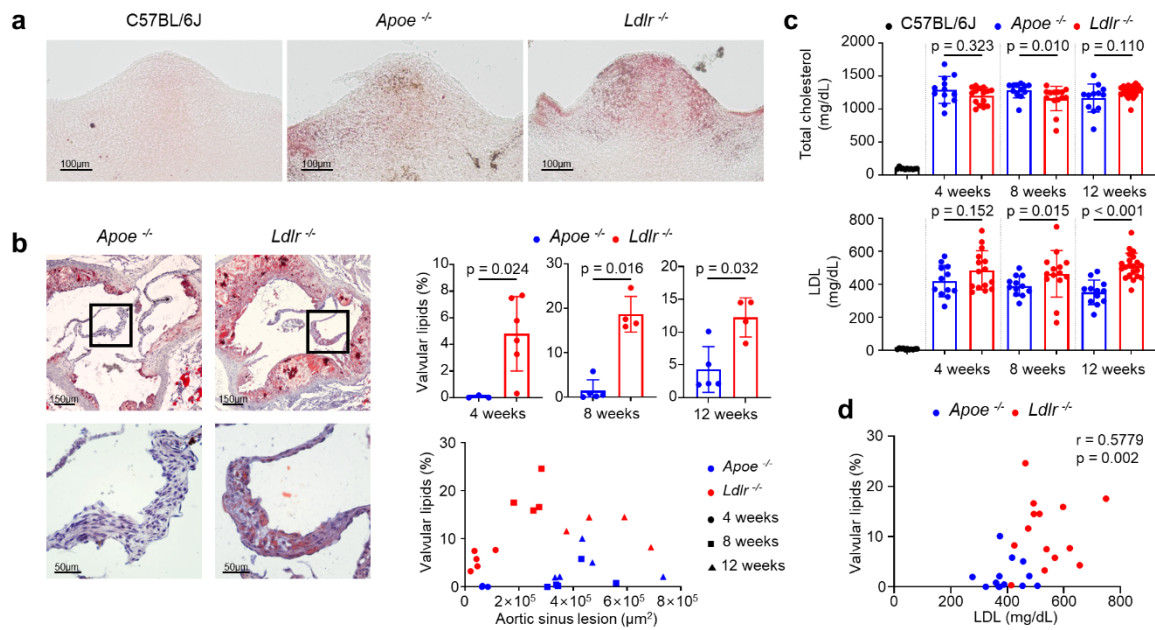

**Supplementary Fig. 2. Comparison of aortic valvular lipid accumulation between WD-fed *Apoe*<sup>-/-</sup> and *Ldlr*<sup>-/-</sup> mice.**

**a, b.** Lipid accumulation in the aortic valves of mice under normal conditions, C57BL/6J (wild type) fed normal chow diet or hyperlipidemic conditions, *Apoe*<sup>-/-</sup> and *Ldlr*<sup>-/-</sup> mice fed a western diet (WD). Whole-mount Oil Red O stain of the aortic valve of C57BL/6J (chow diet) or *Apoe*<sup>-/-</sup> and *Ldlr*<sup>-/-</sup> mice (WD for 16 weeks). Scale bar: 100  $\mu$ m. **(a)** and comparison of aortic valvular lipid accumulation between *Apoe*<sup>-/-</sup> and *Ldlr*<sup>-/-</sup> mice (WD for 4, 8 or 12 weeks). Representative lipid stain images (left), measurement of valvular lipid deposition (right, top) and comparison with aortic sinus lesion (right, bottom) ( $n = 3$  for *Apoe*<sup>-/-</sup>,  $n = 6$  for *Ldlr*<sup>-/-</sup> in 4 weeks;  $n = 8$  for *Apoe*<sup>-/-</sup>,  $n = 4$  for *Ldlr*<sup>-/-</sup> in 8 and 12 weeks). Scale bar: 150  $\mu$ m (left, top), 50  $\mu$ m (left, bottom).

**(b), c.** Total cholesterol and LDL levels in the blood plasma of C57BL/6J (chow diet) or *Apoe*<sup>-/-</sup>, and *Ldlr*<sup>-/-</sup> mice (WD for 4, 8 or 12 weeks) ( $n = 11$  for C57BL/6J;  $n = 12$  for *Apoe*<sup>-/-</sup> in 4, 8, and 12 weeks;  $n = 15$  for *Ldlr*<sup>-/-</sup> in 4 weeks,  $n = 14$  for *Ldlr*<sup>-/-</sup> in 8 weeks,  $n = 21$  for *Ldlr*<sup>-/-</sup> in 12 weeks). **d.** Correlation between valvular lipid deposition and plasma LDL levels. Image data

are representative of three independent experiments unless otherwise stated. For **(b)** and **(c)**, two-sided Mann-Whitney test was used. For **(d)**, the Spearman correlation test was used. Data are presented as mean  $\pm$  SD.

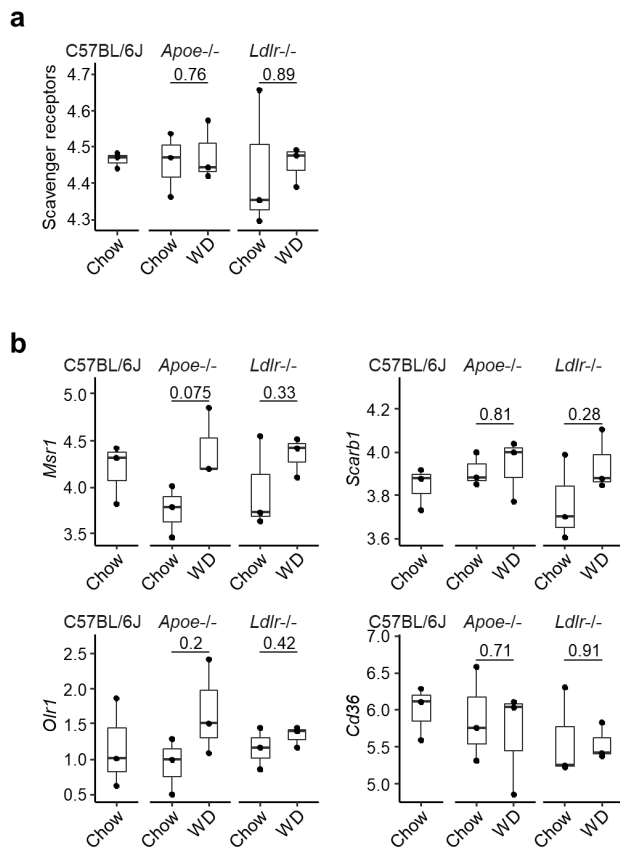

**Supplementary Fig. 3. Expression levels of scavenger receptors in the aortic valve tissue of C57BL/6J, *Apoe*<sup>-/-</sup> and *Ldlr*<sup>-/-</sup> mice.**

**a.** Boxplot of the average expression levels of scavenger receptor genes in the aortic valve tissue of C57BL/6J, *Apoe*<sup>-/-</sup>, and *Ldlr*<sup>-/-</sup> mice (*Ager*, *Cd14*, *Cd163*, *Cd207*, *Cd36*, *Cd68*, *Clec7a*, *Colec12*, *Cxcl16*, *Ly75*, *Marco*, *Megf10*, *Mrc1*, *Msr1*, *Olr1*, *Scara3*, *Scara5*, *Scarb1*, *Scarb2*, *Scarf1*, *Scarf2*, *Ssc4d*, *Ssc5d*, *Stab1*, *Stab2*) ( $n = 3$ ). **b.** Boxplots of the expression levels of each LDL/oxLDL scavenger receptor genes (*Msr1*, *Scarb1*, *Olr1*, and *Cd36*). Chow: chow diet-fed, WD: western diet-fed (for 8 weeks) ( $n = 3$ ). Each box depicts the IQR and median of each score, whiskers indicate 1.5 times the IQR. p, two-sided T-test p-value.

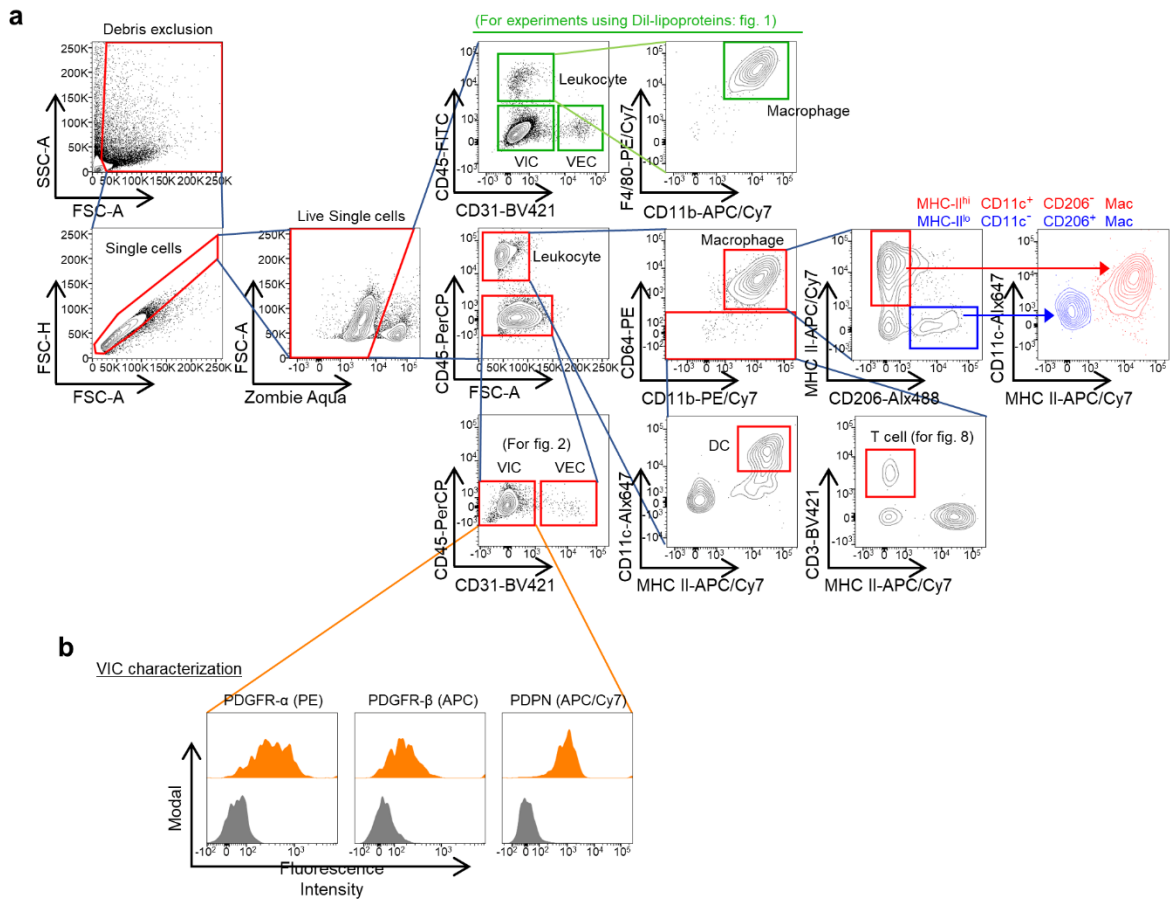

**Supplementary Fig. 4. Gating strategy for flow cytometry analysis of aortic valvular cells.**

**a.** Gating strategy of flow cytometry analysis of aortic valves. Alx488: Alexa Fluor 488. Alx647: Alexa Fluor 647. Mac: Macrophage. **b.** Characterization of VICs. Y-axis option of histograms: Modal (Normalized to mode).

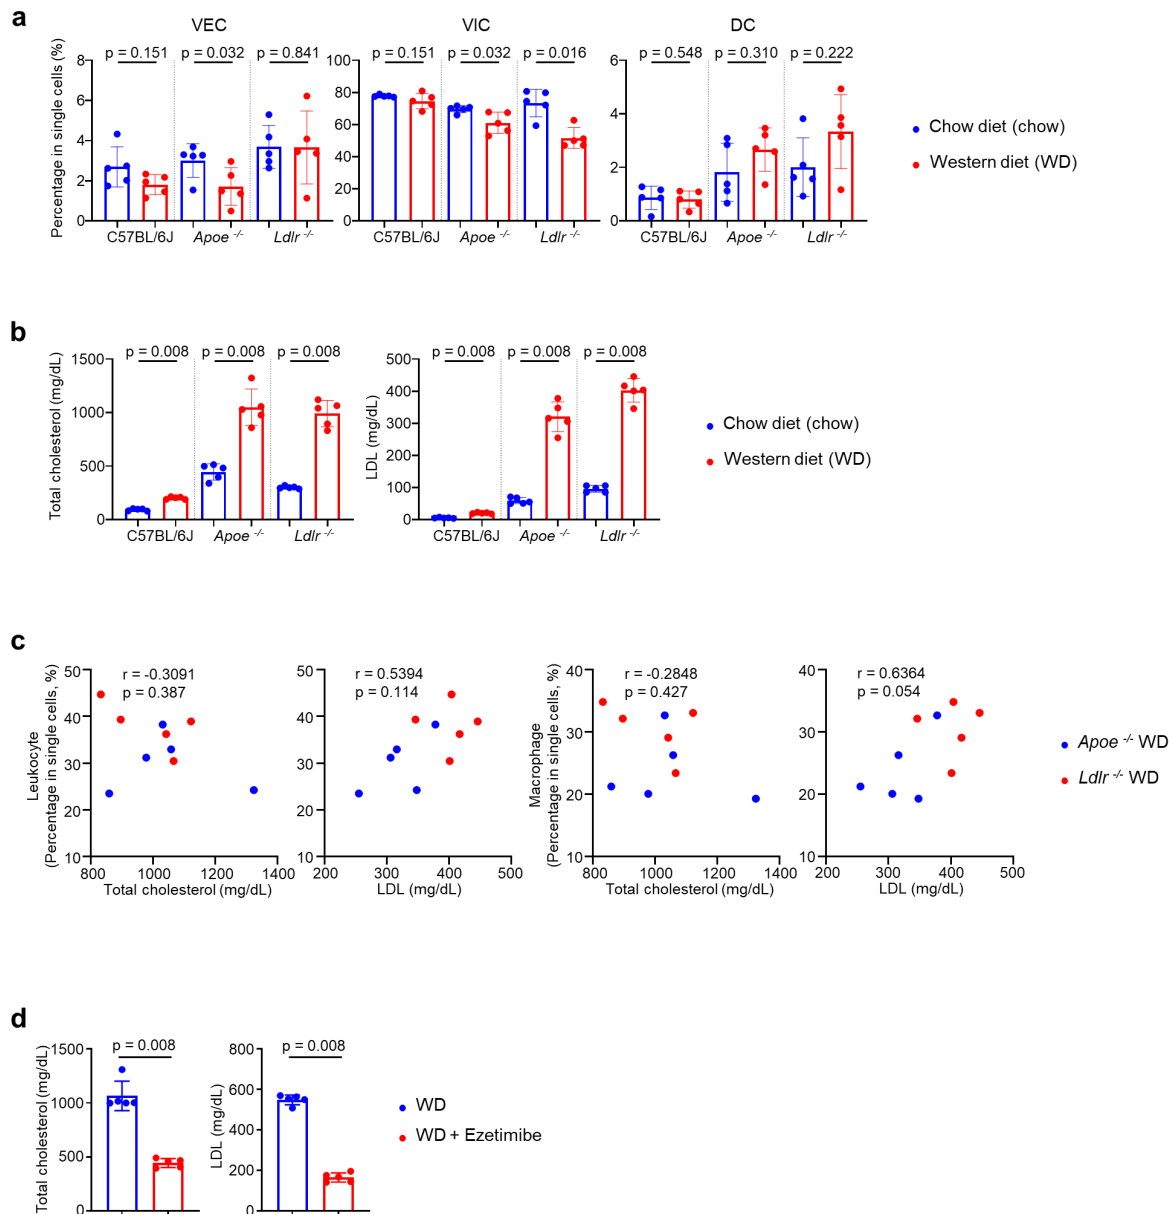

**Supplementary Fig. 5. The relationship between lipid profiles and proportional changes in aortic valvular cells**

**a.** Percentage of VECs, VICs, and DCs in the aortic valvular cells of chow-fed or WD-fed (for 10 weeks) C57BL/6J, *Apoe*<sup>-/-</sup>, and *Ldlr*<sup>-/-</sup> mice ( $n = 5$ ). **b.** Total cholesterol and LDL levels in the blood plasma of chow-fed or WD-fed (for 10 weeks) C57BL/6J, *Apoe*<sup>-/-</sup>, and *Ldlr*<sup>-/-</sup> mice ( $n = 5$ ). **c.** Correlations of total cholesterol and LDL levels with the percentage of leukocytes and

macrophages in the aortic valvular cells of WD-fed (for 10 weeks) hyperlipidemic mice (*ApoE*<sup>-/-</sup> and *Ldlr*<sup>-/-</sup>). **d.** Total cholesterol and LDL levels in the blood plasma of normal WD-fed or ezetimibe containing WD-fed (for 10 weeks) *Ldlr*<sup>-/-</sup> mice (*n* = 5). This figure is extended data of Fig. 2. For **(a)**, **(b)**, and **(d)**, two-sided Mann-Whitney test was used. For **(c)**, the Spearman correlation test was used. Data are presented as mean ± SD.



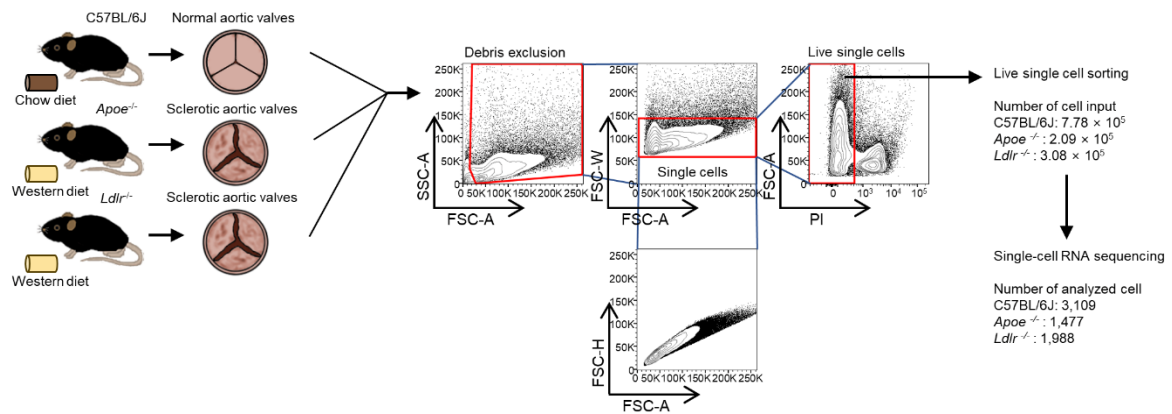

### Supplementary Fig. 6. Cell sorting strategy for scRNA-seq analysis.

Experimental outline of the aortic valve scRNA sequencing with cell sorting strategy. Live single cells were sorted and used in scRNA-seq.

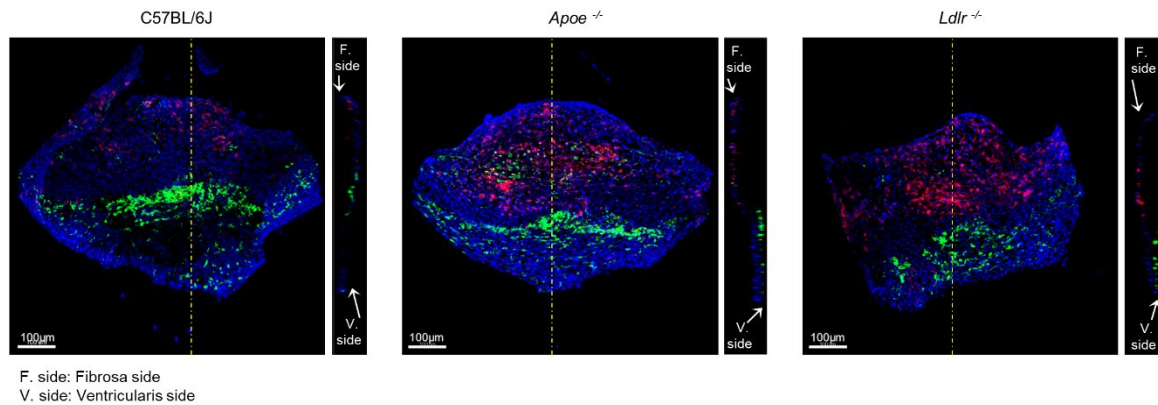

### Supplementary Fig. 7. Spatial location of macrophage subsets.

Z-axis spatial localization of MHC-II<sup>hi</sup> (red) macrophages and CD206<sup>+</sup> (green) macrophages of aortic valve from C57BL/6J, *Apoe*<sup>-/-</sup> and *Ldlr*<sup>-/-</sup> mice. Original image (left), and lengthwise slice view (right). Scale bar: 100µm. Dashed line, plane of slice. This figure is extended data of Fig. 3e. Image data are representative of three independent experiments unless otherwise stated.

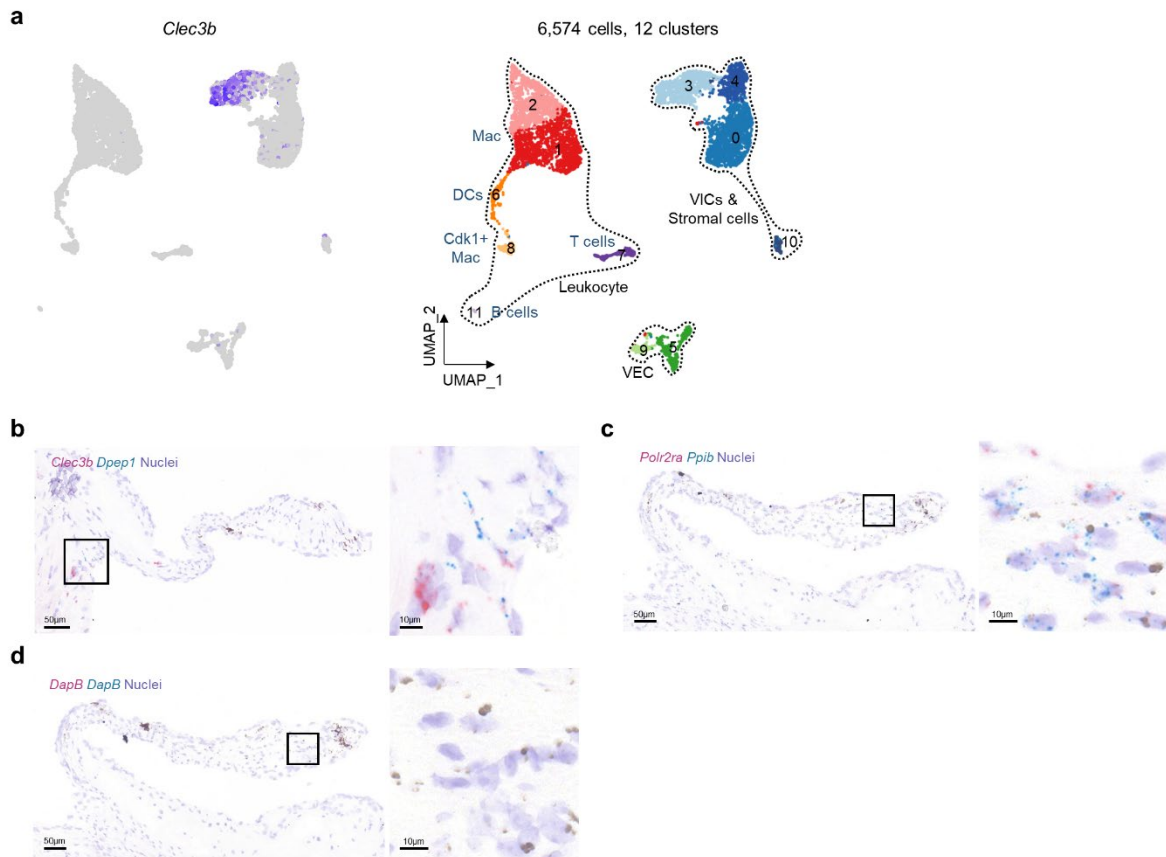

**Supplementary Fig. 8. Location of *Clec3b*<sup>+</sup> *Dpep1*<sup>+</sup> fibroblasts.**

**a.** UMAP plot of gene expression of *Clec3b* (gray to blue). Cluster\_3 expressed a higher level of *Clec3b* than other clusters. **b-d.** RNA in situ hybridization of marker genes (*Clec3b*, *Dpep1*) of Cluster\_3 (*Clec3b*<sup>+</sup> *Dpep1*<sup>+</sup> fibroblasts) with positive and negative control probes. Representative image of RNA in situ hybridization of *Clec3b* (red) and *Dpep1* (green) (**b**), positive control probes: *Polr2ra* (red), *Ppib* (green) (**c**) and negative control probes: *DapB* (red and green) (**d**). Scale bar: 50 μm (left), 10 μm (right). Cluster\_3 cells (*Clec3b*<sup>+</sup> *Dpep1*<sup>+</sup> fibroblasts) were mainly located on the connective tissue adjacent to the hinge of aortic valve. Image data (**b-d**) are representative of at least three independent experiments.

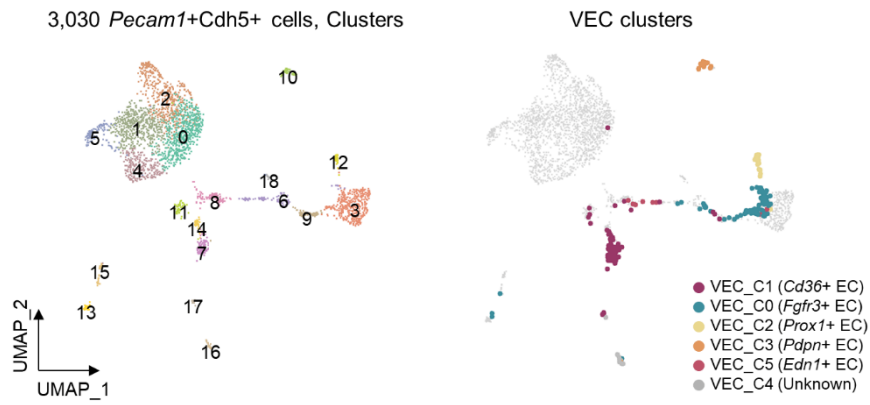

**Supplementary Fig. 9. Meta-analysis of EC diversity from normal aortic ECs and VECs.**

UMAP plot of 3,030 *Pecam1*+*Cdh5*+ cells colored by the clusters (left) and VEC clusters (right). This figure is extended data of Fig. 6.

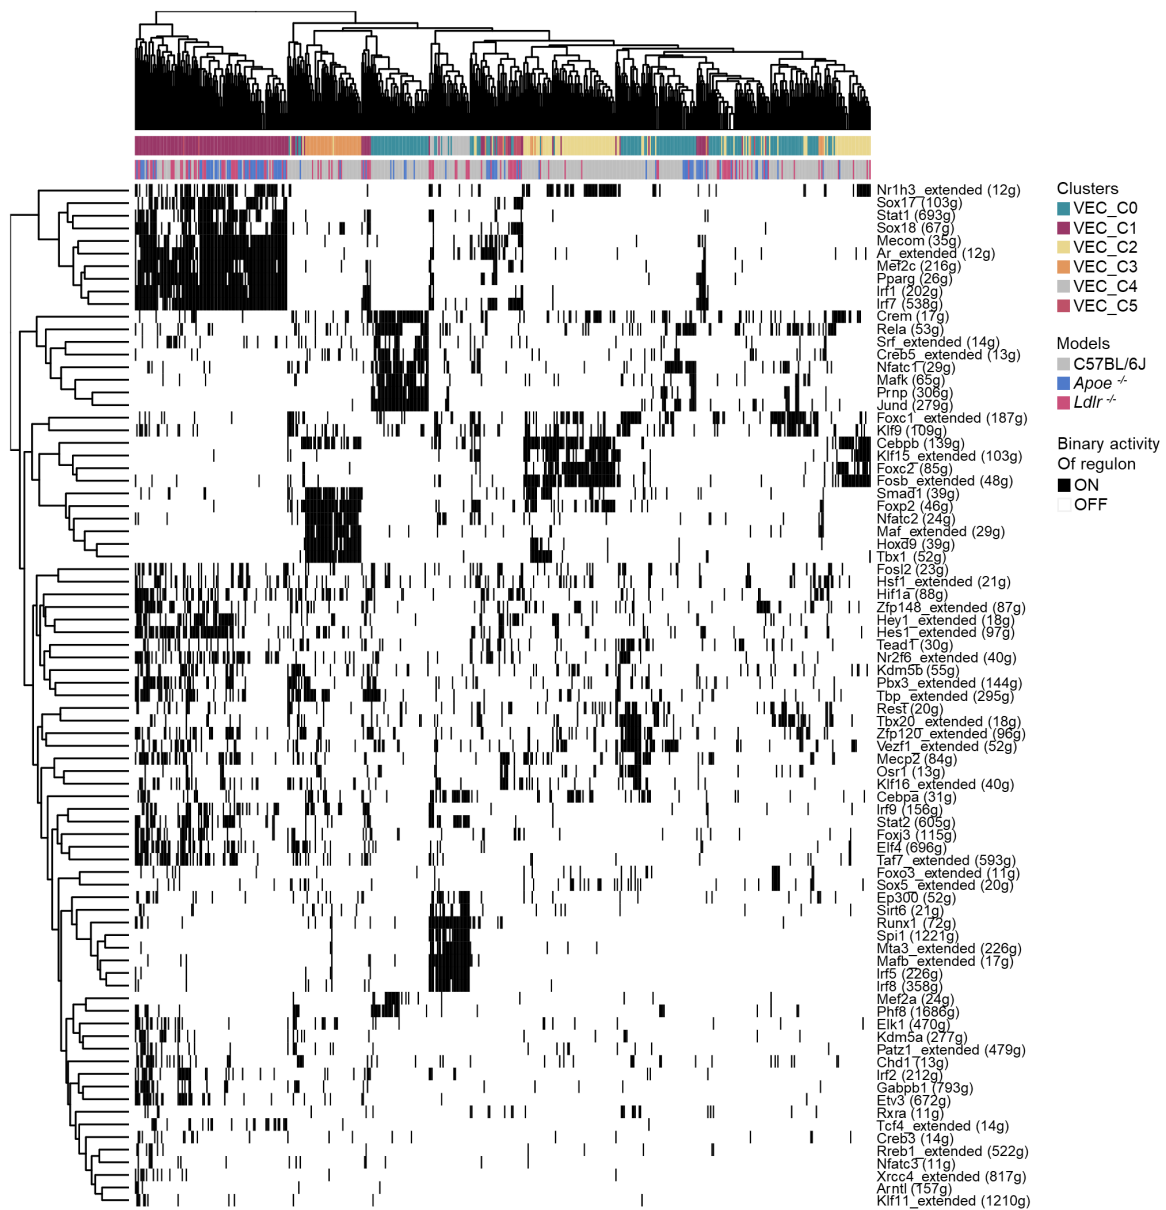

**Supplementary Fig. 10. Heatmap of binary regulon activity for VECs.**

Binary regulon activity is generated from the SCENIC AUC (area under curve) distribution for each cell in VECs.

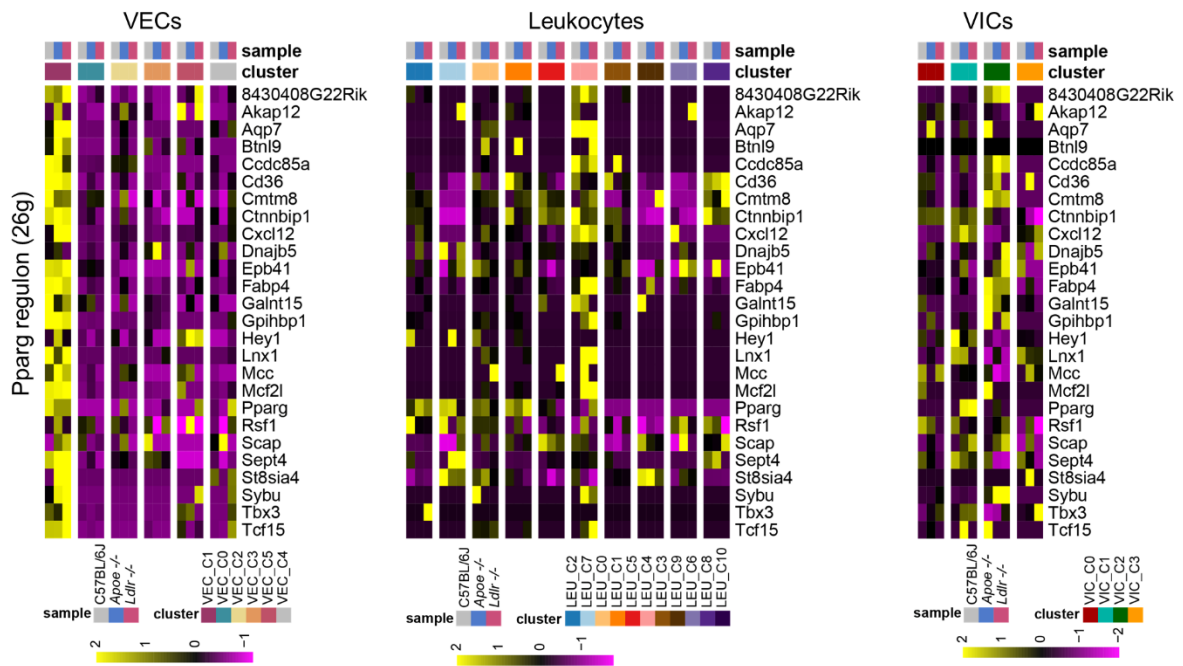

**Supplementary Fig. 11. Heatmap of PPAR $\gamma$  regulon activities.**

Expression map of genes in the PPAR $\gamma$  regulon, which is a gene module provided by SCENIC for each cluster of VECs, leukocytes, and VICs. Color represents average expression levels which are scaled by z-transformation and limited to a scale from -2 to 2. This figure is extended data of Fig. 7.

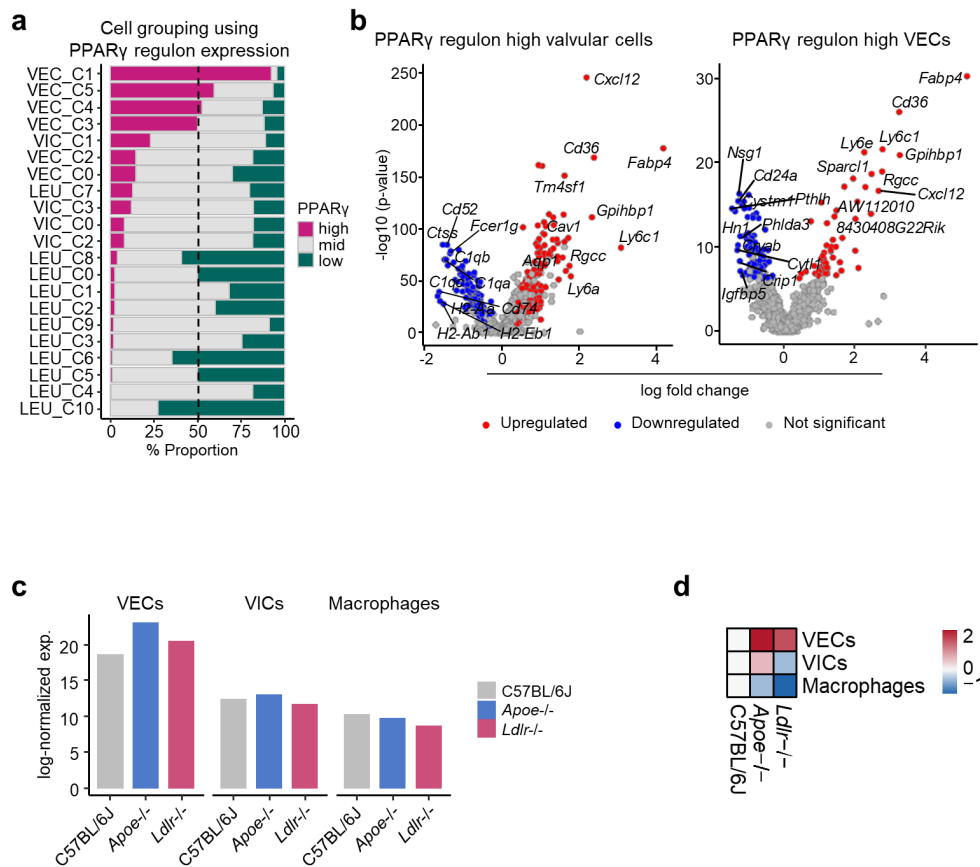

**Supplementary Fig. 12. Analysis of PPAR $\gamma$  regulon and target genes.**

**a, b.** Classification of aortic valvular cells based on average expression level of genes in PPAR $\gamma$  regulon. Percentage of cells grouped into PPAR $\gamma$  high, mid, and low in each cell cluster (**a**) and volcano plot comparing high versus low group in aortic valvular cells (left) and VECs (right) (**b**). p-value, two-sided Wilcoxon rank sum test. **c.** Average expression levels of 49 PPAR $\gamma$  target genes (<http://www.ppargene.org/>) in VECs (VEC\_C0, C1, and C2), VICs, and macrophages for each mouse model. **d.** Relative expression map of PPAR $\gamma$  target genes. Relative expression levels of PPAR $\gamma$  target genes in VECs (VEC\_C0, C1, and C2), VICs, and macrophages of *Ldlr*<sup>-/-</sup> and *Apoe*<sup>-/-</sup> mice, compared with C57BL/6J mice, are shown as log fold changes.

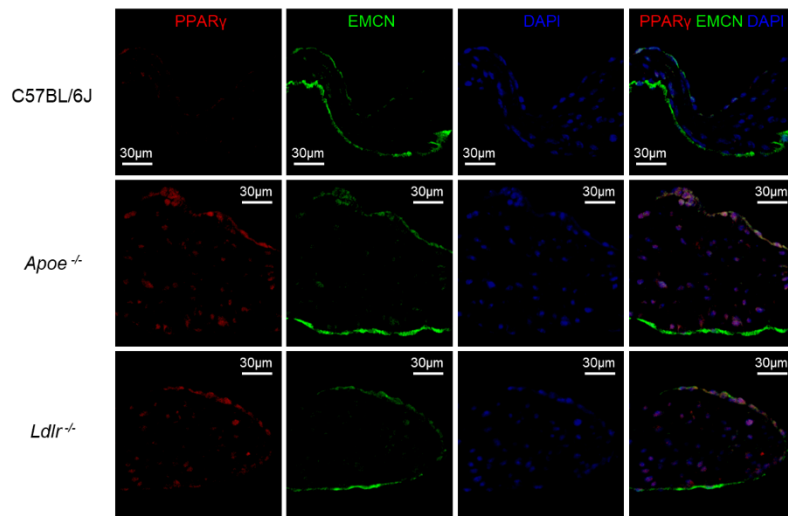

**Supplementary Fig. 13. Immunostaining of PPAR $\gamma$  and EMCN in mouse aortic valve.**

The color split series of each channel with merged image, shown in Fig. 7c. PPAR $\gamma$  (red), EMCN (green), and DAPI (blue). Scale bar: 30  $\mu$ m. This figure is extended data of Fig. 7c. Each image dataset (*C57BL/6J*, *Apoe*<sup>-/-</sup>, and *Ldlr*<sup>-/-</sup>) is representative of four biologically independent samples.



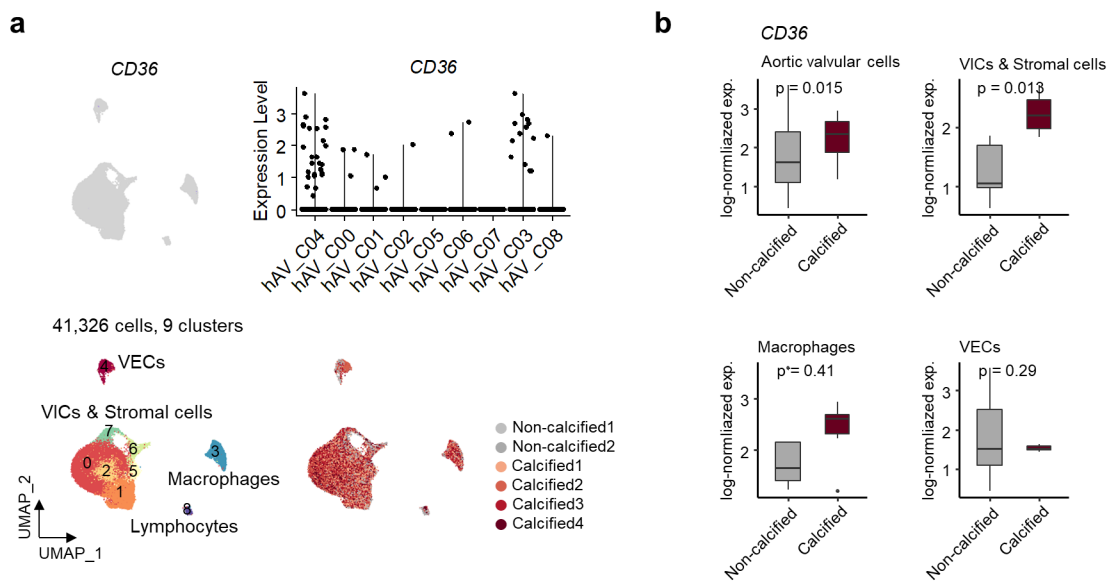

**Supplementary Fig. 14. Expression level of *CD36* in scRNA-seq of human aortic valves.**

**a.** Feature (left) and violin (right) plot of *CD36* expression in each cluster of single-cells derived from human aortic valve. **b.** Comparison of *CD36* expression in calcified versus non-calcified groups for aortic valvular cells (top, left), VICs and stromal cells (top, right), macrophages (bottom, left), and VECs (bottom, right). Cells having no expression for *CD36* were excluded (n=14 and 35 cells for aortic valvular cells; 4 and 5 cells for VICs and stromal cells; 8 and 5 cells for macrophages; 2 and 24 cells for VECs in calcified and non-calcified groups). Each box depicts the IQR and median of each score, whiskers indicate 1.5 times the IQR. p, two-sided T-test p-value.

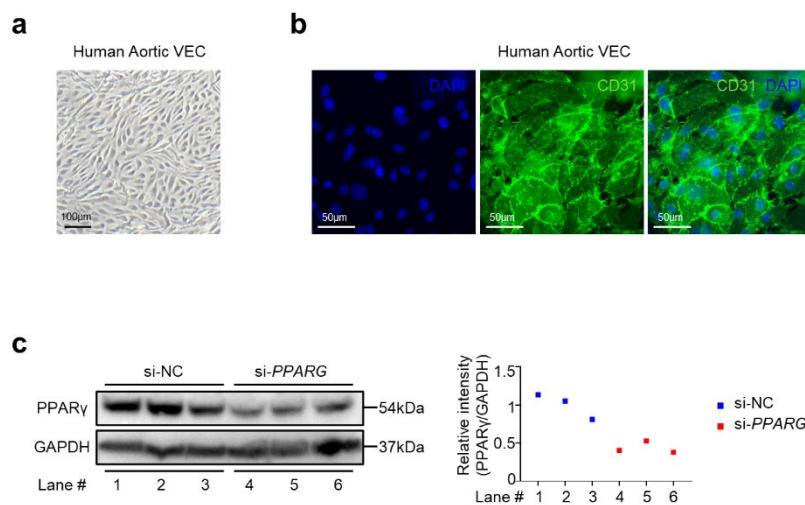

**Supplementary Fig. 15. *PPARG* gene silencing mediated by siRNA in human aortic VECs.**

**a.** Phase contrast microscopy image of cultured human aortic VECs at passage 3. Scale bar: 100  $\mu$ m. **b.** Immunocytochemistry of CD31 (green) in human aortic VECs. DAPI (blue) was used for nuclei staining. Scale bar: 50  $\mu$ m. **c.** *PPARG* gene knockdown by siRNA was validated by western blot ( $n = 3$ ). The graph indicates the relative intensity of PPAR $\gamma$  to GAPDH. si-NC: negative control siRNA, si-*PPARG*: siRNA targeting *PPARG*. Image data are representative of at least three independent experiments.

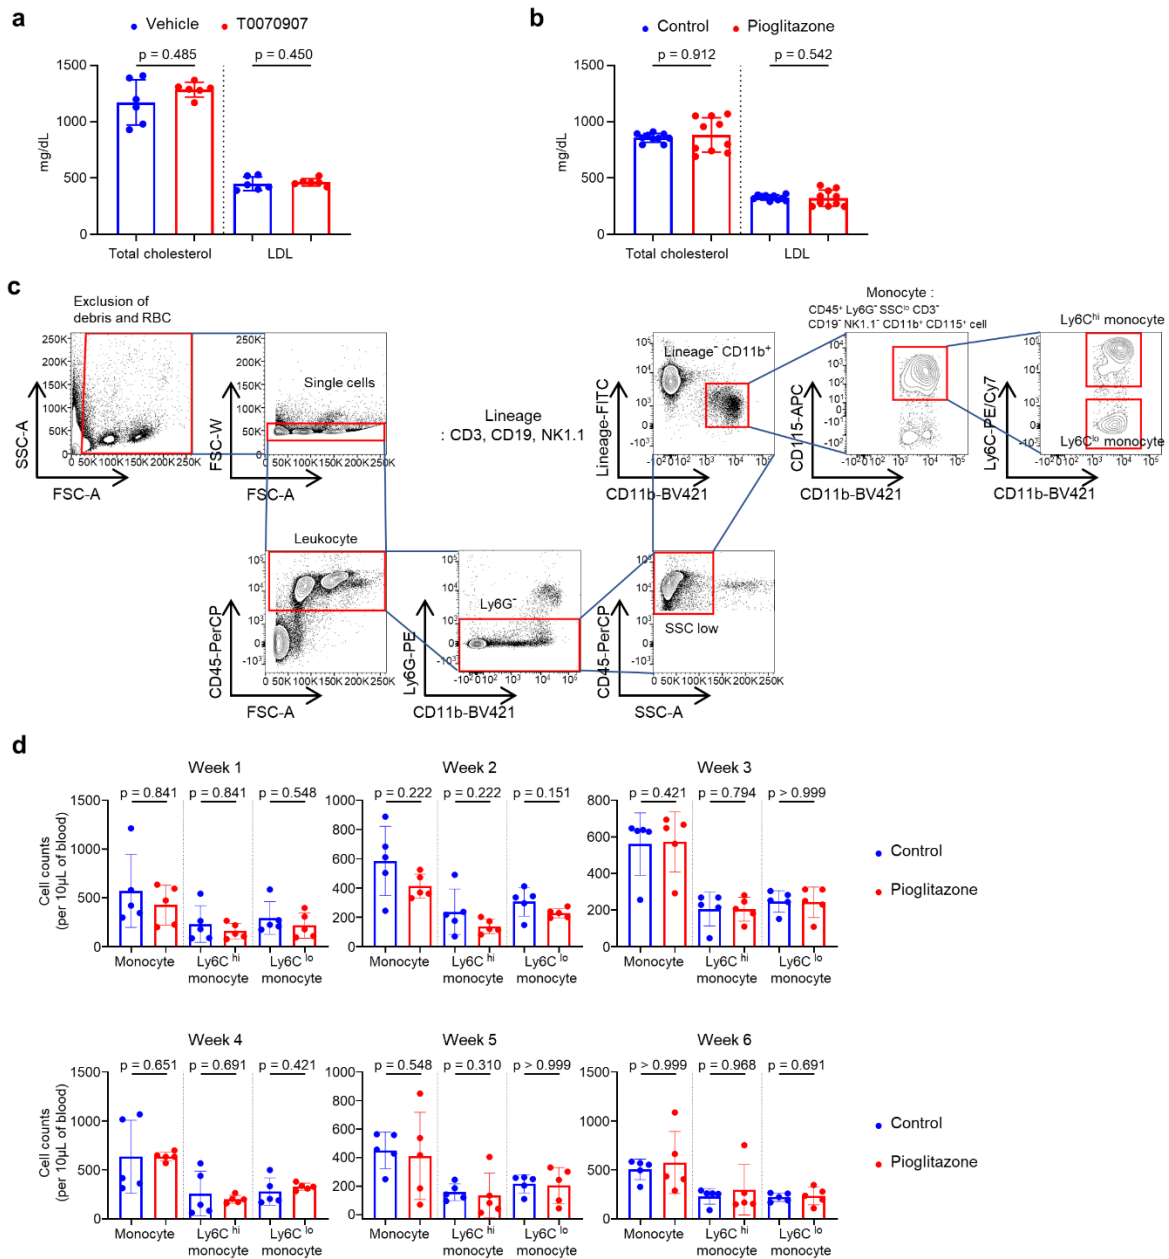

**Supplementary Fig. 16. Effects of PPAR $\gamma$  modulation in blood lipid profiles and the number of circulating monocytes.**

**a.** Plasma total cholesterol and LDL levels of mice with T0070907 or vehicle administration ( $n = 6$ ). **b.** Plasma total cholesterol and LDL levels of mice fed with pioglitazone-containing WD (pioglitazone) or normal WD (control) ( $n = 10$ ). **c, d.** Flow cytometry analyses of circulating blood monocytes, for 6 weeks. PCSK9-AAV-injected C57BL/6J mice were fed

with pioglitazone-containing WD or normal WD for 6 weeks, and the number of monocytes and subsets in 10  $\mu$ L of blood was examined once a week ( $n = 5$ ). The gating strategy of blood monocytes and subsets. **(c)** and cell counts of monocytes, Ly6C high monocytes, and Ly6C low monocytes in 10  $\mu$ L of blood, from week 1 to 6 **(d)**. This figure is extended data of Fig. 8. Two-sided Mann-Whitney test was used for group comparisons. Data are presented as mean  $\pm$  SD.

| Group                      | ID        | Age           | Sex   | Height (cm)   | Weight (kg)   | Comorbidity  |                   | Serum lipid profiles (mg / dL) |               |              |               |
|----------------------------|-----------|---------------|-------|---------------|---------------|--------------|-------------------|--------------------------------|---------------|--------------|---------------|
|                            |           |               |       |               |               | Hypertension | Diabetes mellitus | Total cholesterol              | Triglyceride  | HDL          | LDL           |
| Non-calcified              | #1        | 67            | M     | 160           | 56.7          | Yes          | No                | 208                            | 247           | 38           | 122           |
|                            | #2        | 67            | F     | 152           | 62.1          | Yes          | No                | 273                            | 325           | 54           | 153           |
|                            | #3        | 73            | M     | 162           | 67.9          | Yes          | No                | 126                            | 110           | 45           | 31            |
|                            | #4        | 71            | M     | 166           | 64.6          | Yes          | No                | 195                            | 153           | 63           | 90            |
|                            | #5        | 64            | M     | 157           | 59.9          | No           | No                | 132                            | 73            | 85           | 91            |
|                            | #6        | 53            | M     | 176           | 91.9          | Yes          | Yes               | 118                            | 220           | 40           | 63            |
|                            | #7        | 52            | M     | 170           | 69.4          | No           | No                | 105                            | 56            | 25           | 75            |
|                            | Mean ± SD | 63.86 ± 8.295 | N/A   | 163.3 ± 8.098 | 67.5 ± 11.63  | N/A          | N/A               | 165.3 ± 61.69                  | 169.1 ± 98.95 | 50 ± 19.6    | 89.29 ± 39.63 |
| Calcified                  | #1        | 76            | M     | 161           | 62.6          | Yes          | No                | 151                            | 90            | 41           | 108           |
|                            | #2        | 75            | M     | 161           | 63.4          | Yes          | No                | 146                            | 183           | 41           | 87            |
|                            | #3        | 85            | M     | 163.9         | 60.8          | Yes          | No                | 171                            | 78            | 51           | 102           |
|                            | #4        | 75            | F     | 157.4         | 67.5          | Yes          | No                | 138                            | 96            | 58           | 64            |
|                            | #5        | 61            | F     | 156.8         | 60.3          | Yes          | No                | 148                            | 277           | 33           | 70            |
|                            | Mean ± SD | 74.4 ± 8.591  | N/A   | 160 ± 2.924   | 62.92 ± 2.858 | N/A          | N/A               | 150.8 ± 12.28                  | 144.8 ± 84.83 | 44.8 ± 9.757 | 86.2 ± 19.24  |
| Group comparison (p-value) | 0.043     | N/A           | 0.508 | 0.639         | N/A           | N/A          | 0.755             | 0.876                          | 0.845         | > 0.999      |               |

**Supplementary Table 1. Patient clinical information of human sample used in histological analysis.**

All patients provided informed consent, including to the publication of information that identifies individuals. Two-sided Mann-Whitney test was used for group comparisons (age, height, weight, and parameters of serum lipid profiles). M: male. F: female.

|            |                                                | C57BL/6J   | Apoe -/-    | Ldlr -/-    |
|------------|------------------------------------------------|------------|-------------|-------------|
| Sequencing | Number of Reads                                | 46,539,591 | 151,825,684 | 181,607,997 |
|            | Q30 Bases in Barcode                           | 96.2%      | 97.5%       | 97.5%       |
|            | Q30 Bases in RNA Read                          | 84.9%      | 89.0%       | 89.1%       |
|            | Q30 Bases in Sample Index                      | 94.7%      | 96.3%       | 95.3%       |
|            | Q30 Bases in UMI                               | 96.3%      | 97.6%       | 97.6%       |
| Mapping    | Reads Mapped to Genome                         | 95.7%      | 96.8%       | 96.8%       |
|            | Reads Mapped Confidently to Genome             | 92.2%      | 92.2%       | 91.9%       |
|            | Reads Mapped Confidently to Intergenic Regions | 2.6%       | 2.1%        | 2.0%        |
|            | Reads Mapped Confidently to Intronic Regions   | 13.8%      | 9.4%        | 9.1%        |
|            | Reads Mapped Confidently to Exonic Regions     | 75.8%      | 80.8%       | 80.8%       |
|            | Reads Mapped Confidently to Transcriptome      | 73.6%      | 78.6%       | 78.7%       |
|            | Reads Mapped Antisense to Gene                 | 0.9%       | 0.7%        | 0.7%        |
| Cells      | Mean Reads per Cell                            | 14,575     | 94,477      | 85,502      |
|            | Median UMI Counts per Cell                     | 3,351      | 6,708       | 5,514       |
|            | Median Genes per Cell                          | 1,380      | 2,114       | 1,760       |
|            | Total Genes Detected                           | 16,933     | 16,822      | 16,705      |
|            | Estimated Number of Cells                      | 3,193      | 1,607       | 2,124       |
|            | Number of Quality Control Pass Cells           | 3,109      | 1,477       | 1,988       |

**Supplementary Table 2. Summary of scRNA sequencing parameters.**
